# Supplementary material for: Quantitative Detection of Natural Rubber Content in Eucommia ulmoides by Portable Pyrolysis-Membrane Inlet Mass Spectrometry
Source: Molecules. 2023 Apr 10;28(8):3330. doi: 10.3390/molecules28083330 (PMC10142753; doi:10.3390/molecules28083330)
Supplement: Supplementary file 1 [file molecules-28-03330-s001.zip › molecules-2282781-supplementary.pdf]

## *Supplementary Material*

# **Quantitative Detection of Natural Rubber Content in *Eucommia ulmoides* by Portable Pyrolysis-Membrane Inlet Mass Spectrometry**

Minmin Guo <sup>1,2</sup>, Mingjian Zhang <sup>1,2</sup>, Shunkai Gao <sup>1,2</sup>, Lu Wang <sup>1,2</sup>, Jichuan Zhang <sup>2,3</sup>, Zejian Huang <sup>4,\*</sup> and Yiyang Dong <sup>1,2\*</sup>

\* Corresponding author:

Zejian Huang

huangzj@nim.ac.cn

\* Corresponding author:

Yiyang Dong

yydong@mail.buct.edu.cn

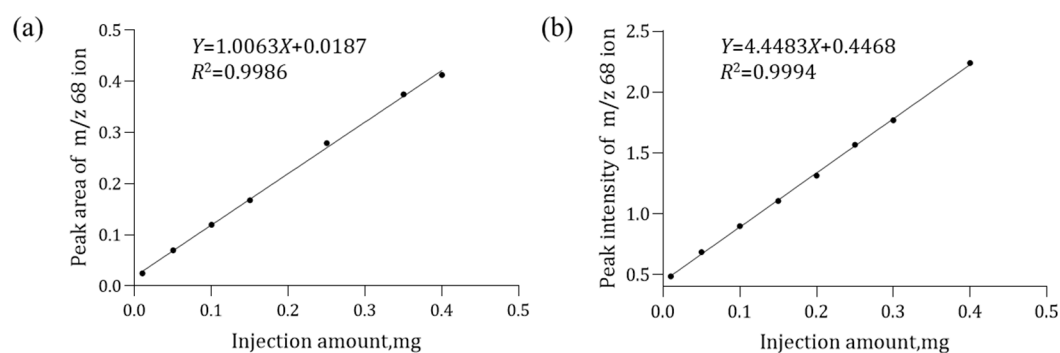

**Figure S1.** (a) Calibration curve based on  $m/z$  68 ion peak area; (b) Calibration curve based on  $m/z$  68 ion peak intensity.

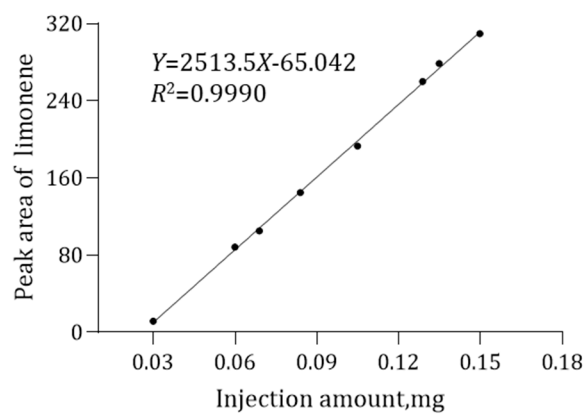

**Figure S2.** Calibration curve of limonene by PY-GC method.
